# Supplementary material for: A smart copper(ii)-responsive binuclear gadolinium(iii) complex-based magnetic resonance imaging contrast agent
Source: Royal Society of Chemistry journal article supplement (doi:10.1039/c4ra04526b), 2014-01-01
Supplement: c4ra04526b1.pdf [file c4ra04526b1.pdf]

## A smart copper (II) responsive binuclear gadolinium (III) complex based magnetic resonance imaging contrast agent

Yan-meng Xiao,<sup>a,b</sup> Gui-yan Zhao,<sup>a,b</sup> Xin-xiu Fang,<sup>a,b</sup> Yong-xia Zhao,<sup>a,b</sup> Guan-hua Wang<sup>c</sup>,  
Wei Yang\*<sup>a</sup> and Jing-wei Xu\*<sup>a</sup>

<sup>a</sup>State Key Laboratory of Electroanalytical Chemistry, Changchun Institute of Applied Chemistry, Changchun 130022, China. Fax: 86 431 85262649; Tel: 86 431 85262643;

<sup>b</sup>University of Chinese Academy of Sciences, Beijing, 100039

P.R. China. E-mail: [jwxu@ciac.ac.cn](mailto:jwxu@ciac.ac.cn); [yangwei@ciac.ac.cn](mailto:yangwei@ciac.ac.cn);

<sup>c</sup>Guangdong Provincial Public Laboratory of Analysis and Testing Technology, Guangdong Institute of Analysis, Guangzhou 510070, P. R. China.

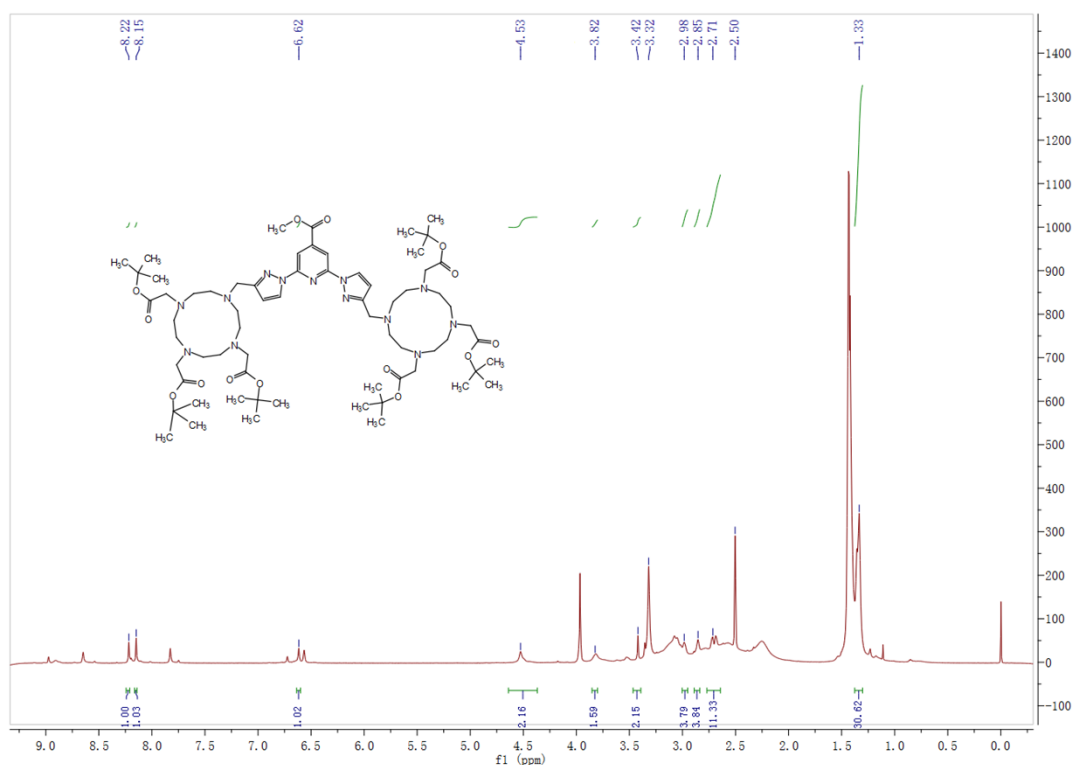

**Fig. S1** <sup>1</sup>H NMR spectrum of Compound 3 in DMSO (600 MHz).

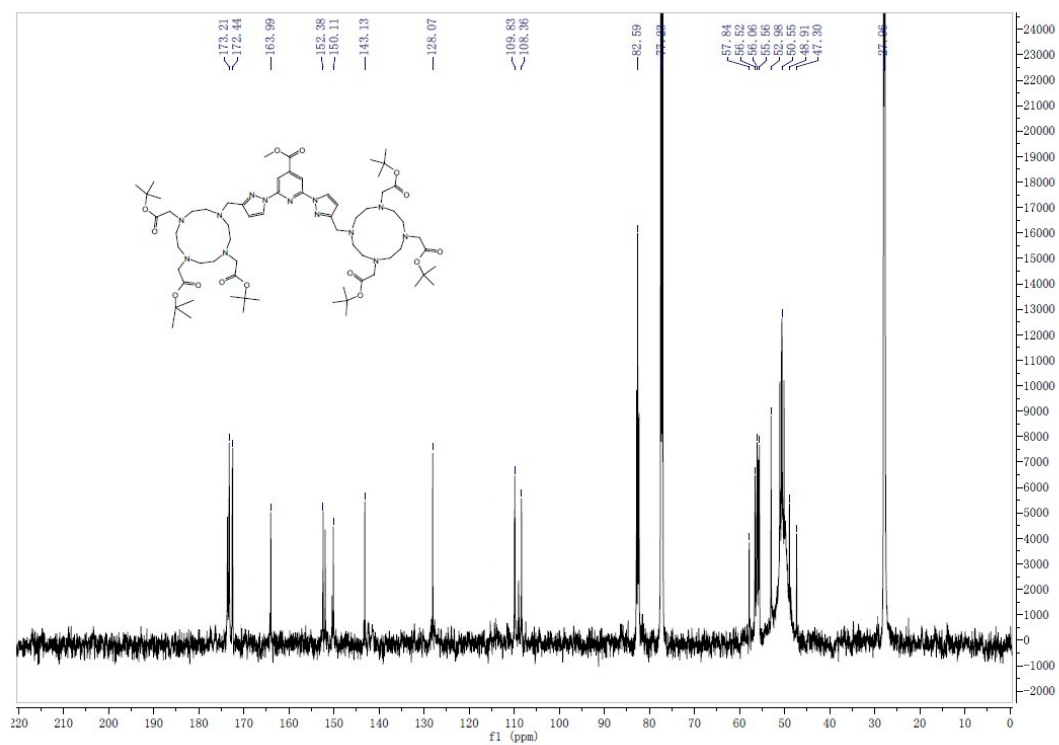

Fig. S2  $^{13}\text{C}$  NMR spectrum of Compound 3 in  $\text{CDCl}_3$  (151 MHz).

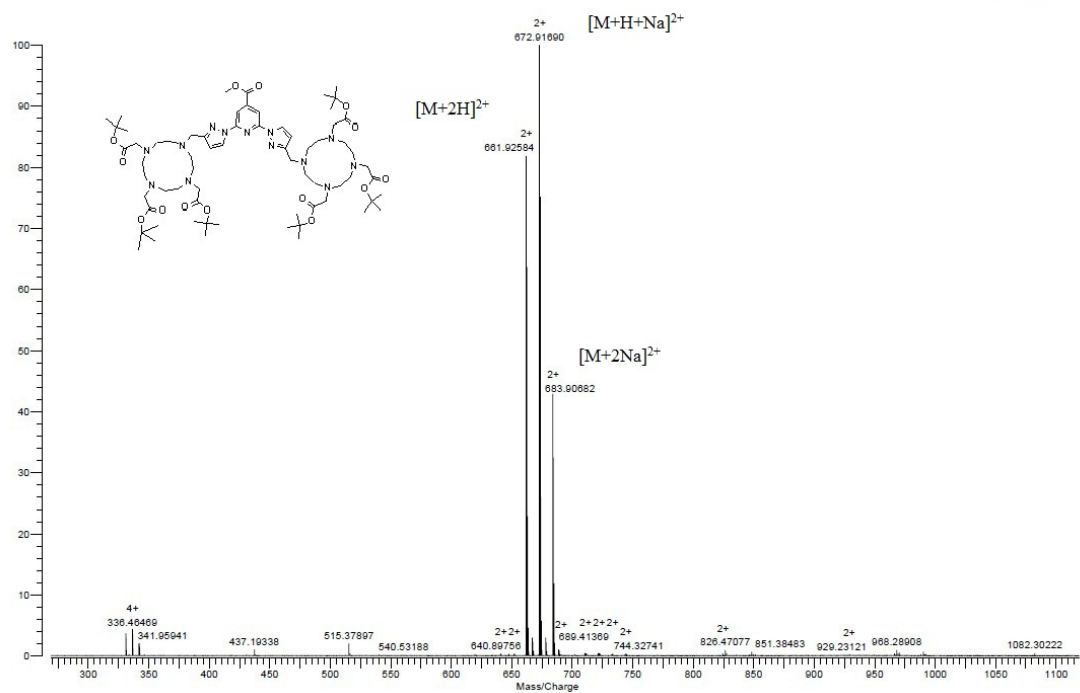

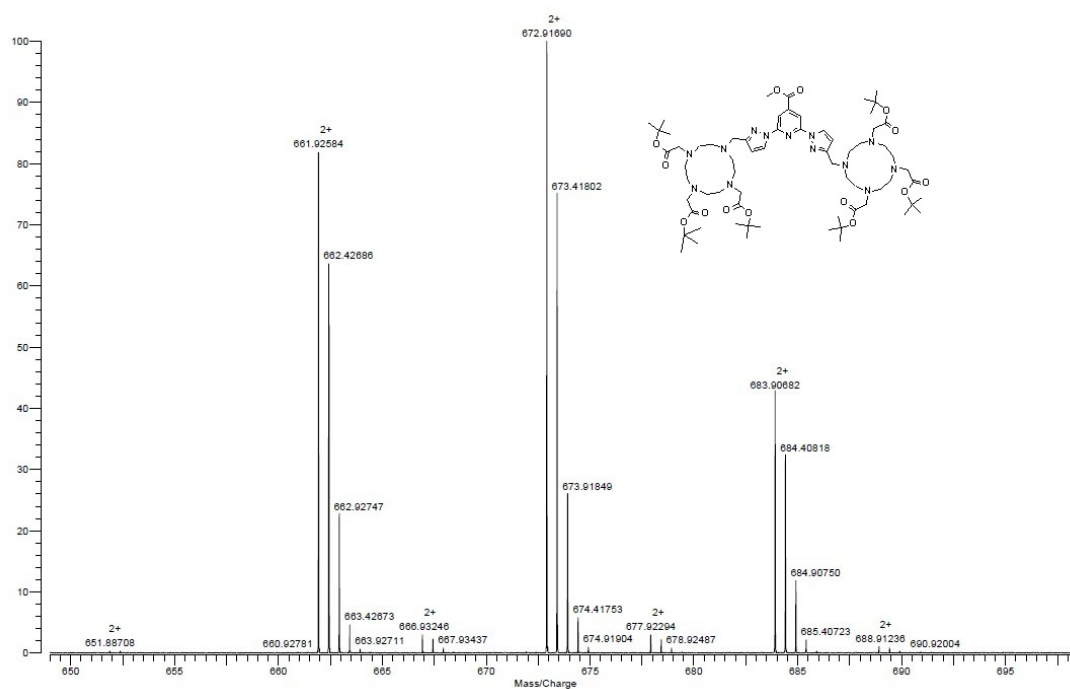

**Fig. S3** HRMS (ESI) spectrum and expanded view of **Compound 3**. The peaks at  $m/z = 661.92584$ ,  $672.91690$ , and  $683.90682$  correspond to  $[M + 2H]^{2+}$  (calc.  $661.92650$ ),  $[M + H + Na]^{2+}$  (calc.  $672.91747$ ), and  $[M + 2Na]^{2+}$  (calc.  $683.90844$ ) respectively.

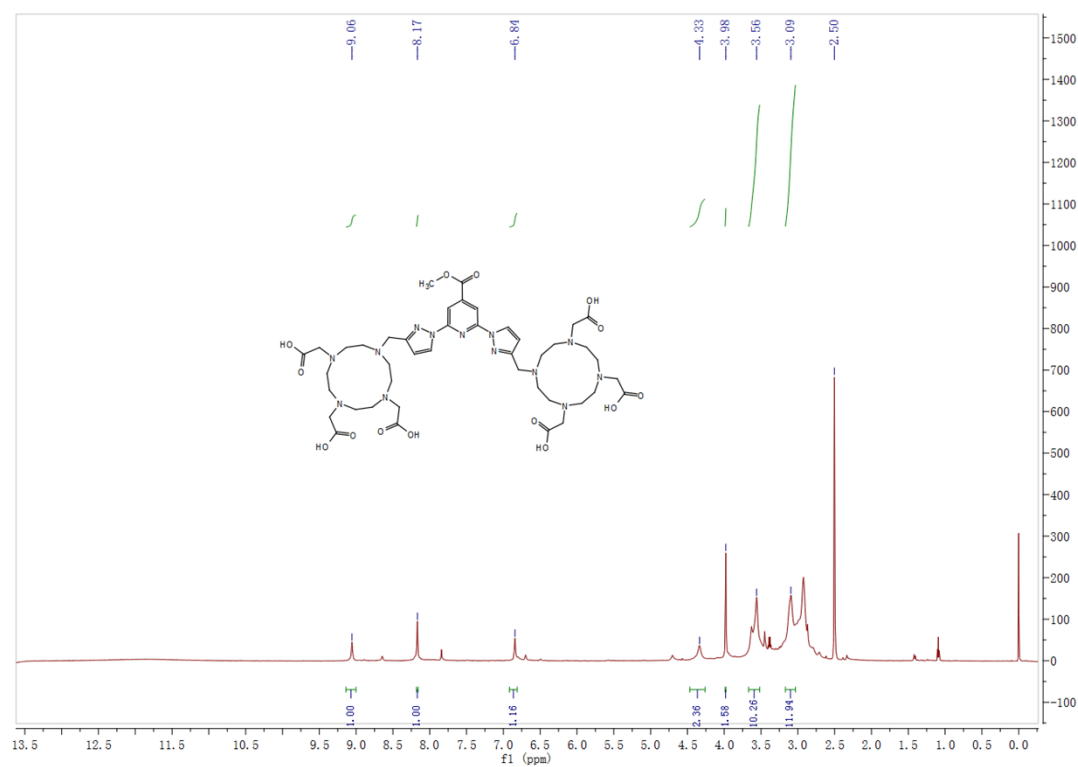

**Fig. S4**  $^1\text{H}$  NMR spectrum of **Compound 4** in DMSO (600 MHz).

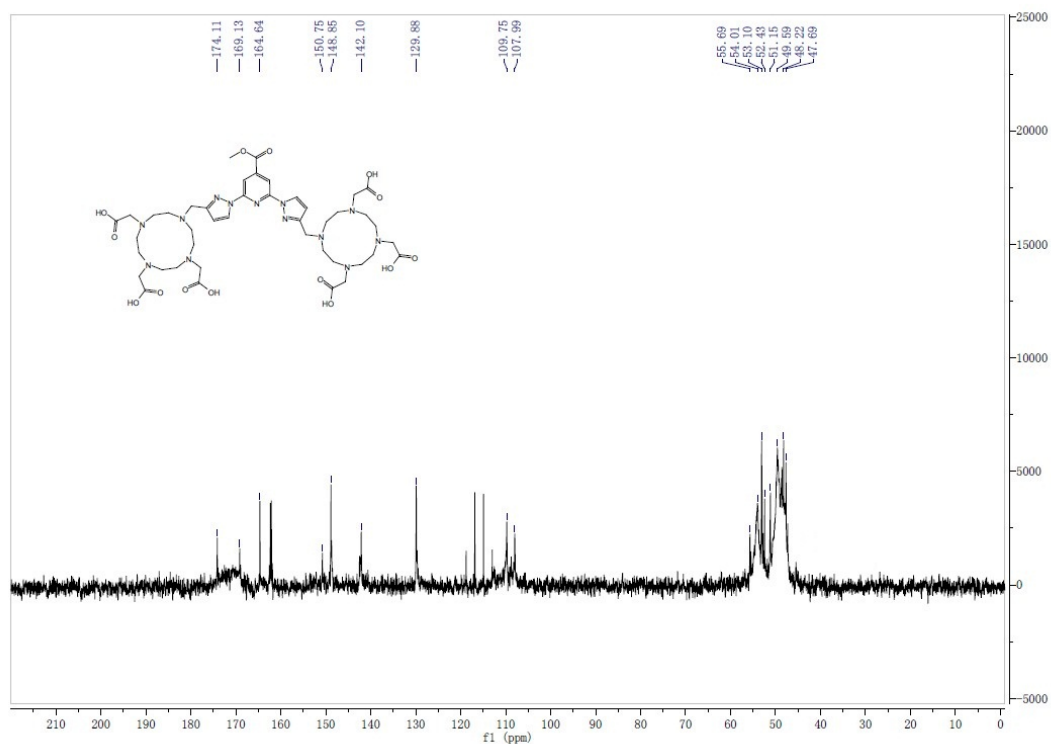

**Fig. S5**  $^{13}\text{C}$  NMR spectrum of Compound 4 in  $\text{D}_2\text{O}$  (151 MHz).

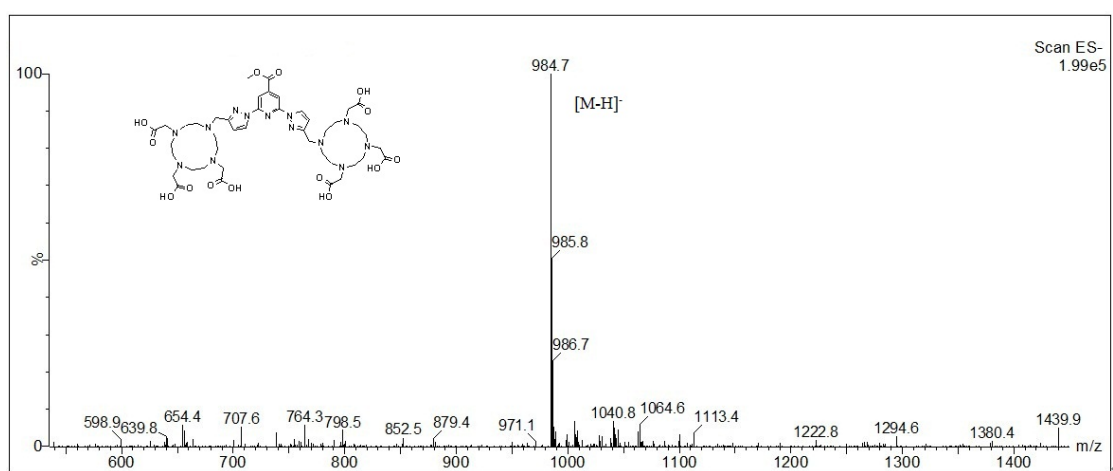

**Fig. S6** MALDI-TOF-MS spectrum of Compound 4. The peak at  $m/z = 984.7$  correspond to  $[\text{M} - \text{H}]^-$  (calc. 984.46).

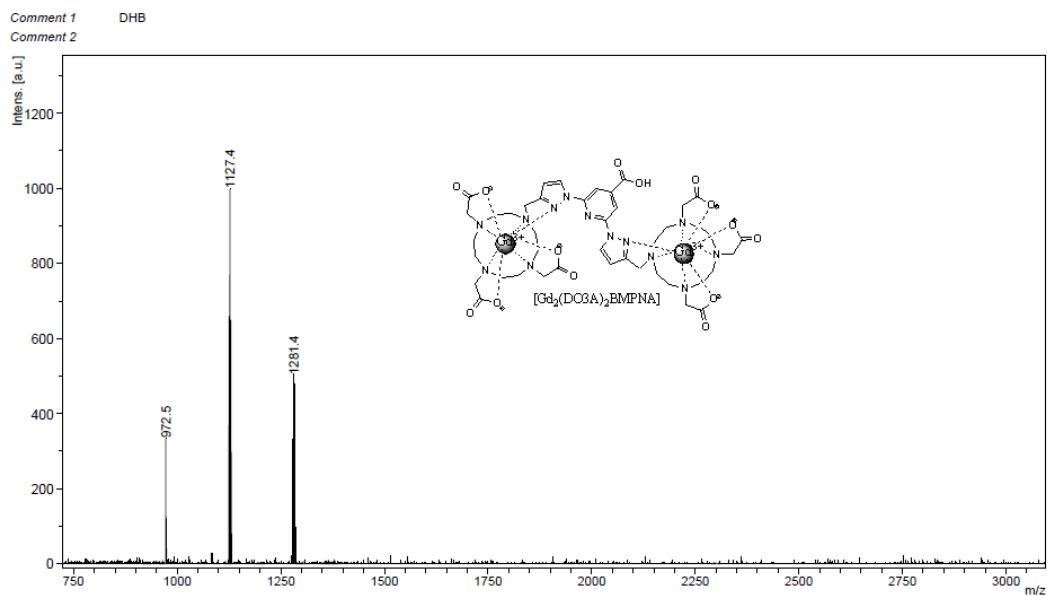

**Fig. S7** MALDI-TOF-MS spectrum of [Gd<sub>2</sub>(DO<sub>3</sub>A)<sub>2</sub>BMPNA]. The peak at  $m/z = 1281.4$  correspond to  $[M + H]^+$  (calc. 1281.46).

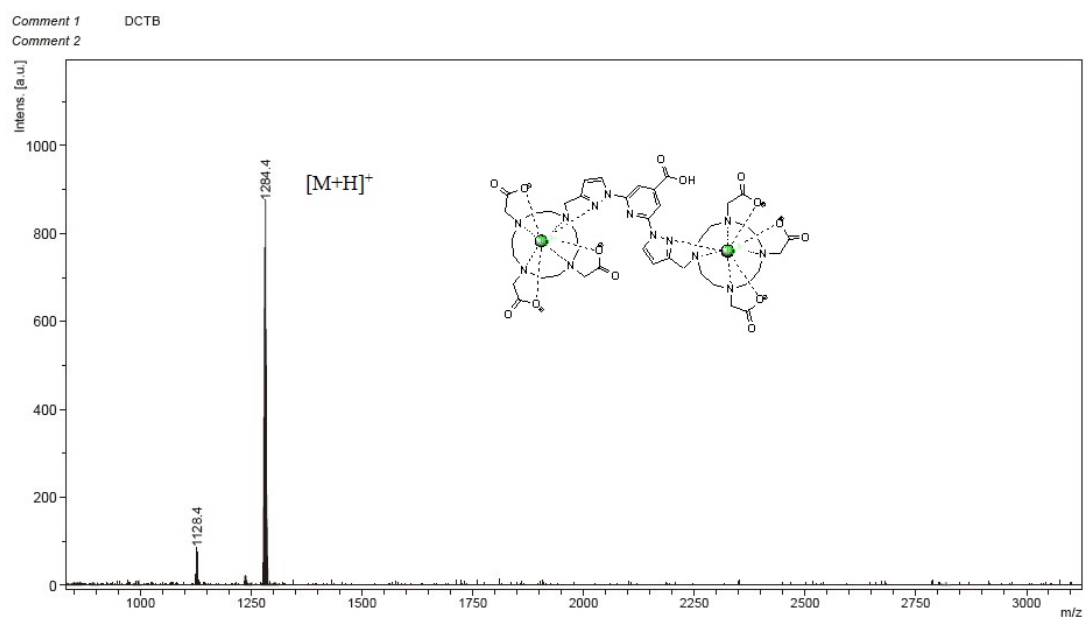

**Fig. S8** MALDI-TOF-MS spectrum of [Tb<sub>2</sub>(DO<sub>3</sub>A)<sub>2</sub>BMPNA]. The peak at  $m/z = 1284.4$  correspond to  $[M + H]^+$  (calc. 1284.3).

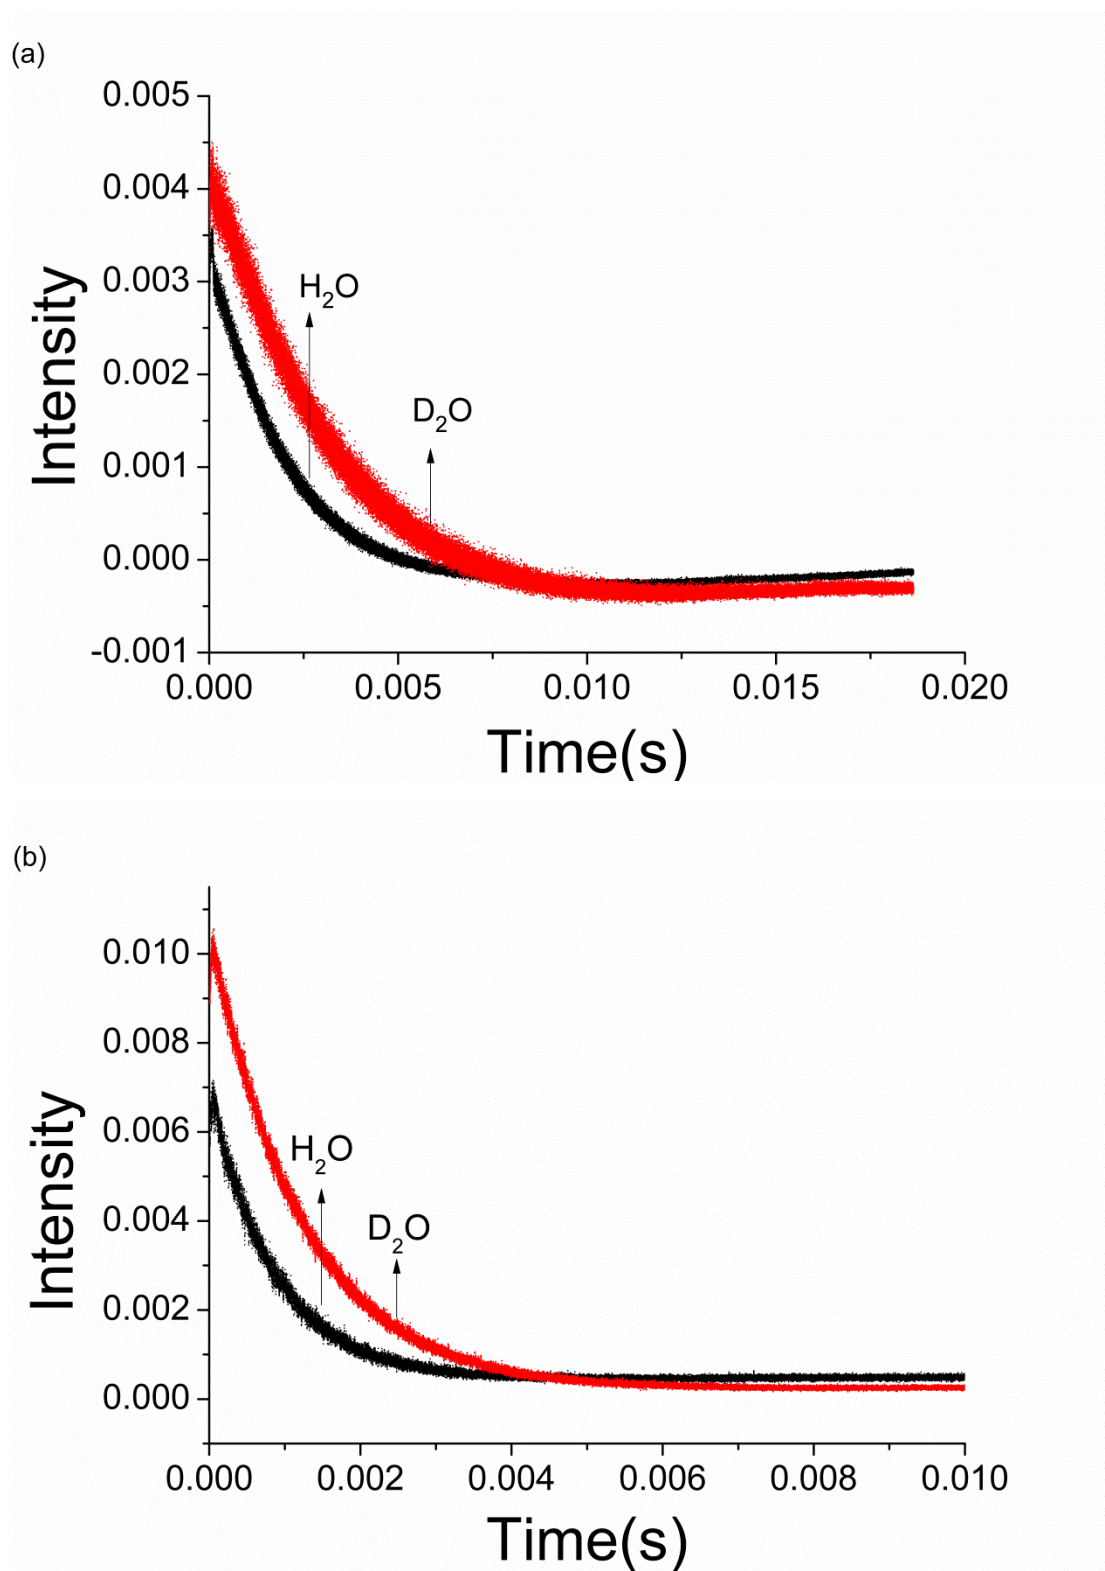

**Fig. S9** (a) Luminescence decay of [Tb<sub>2</sub>(DO3A)<sub>2</sub>BMPNA] in H<sub>2</sub>O and D<sub>2</sub>O without addition of Cu<sup>2+</sup>;  
(b) Luminescence decay of [Tb<sub>2</sub>(DO3A)<sub>2</sub>BMPNA] in H<sub>2</sub>O and D<sub>2</sub>O with addition of Cu<sup>2+</sup>.

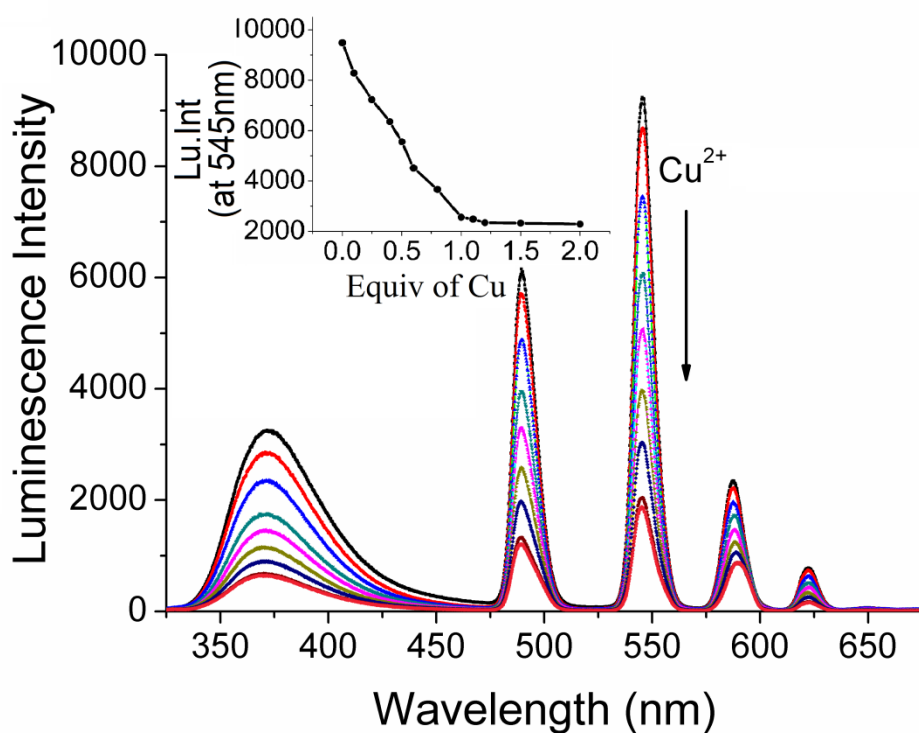

**Fig. S10** Luminescence spectra of  $[\text{Tb}_2(\text{DO3A})_2\text{BMPNA}]$  ( $20 \mu\text{M}$ ) upon addition of different concentrations of  $\text{Cu}^{2+}$  (0-2 equiv.) in HEPES-buffered (pH 7.4, 100 mM) aqueous solutions. Excitation wavelength: 295 nm. Inset shows the luminescence at 545 nm as a function of  $\text{Cu}^{2+}$  concentration suggesting a 1:1 binding ratio between  $[\text{Tb}_2(\text{DO3A})_2\text{BMPNA}]$  and  $\text{Cu}^{2+}$ .

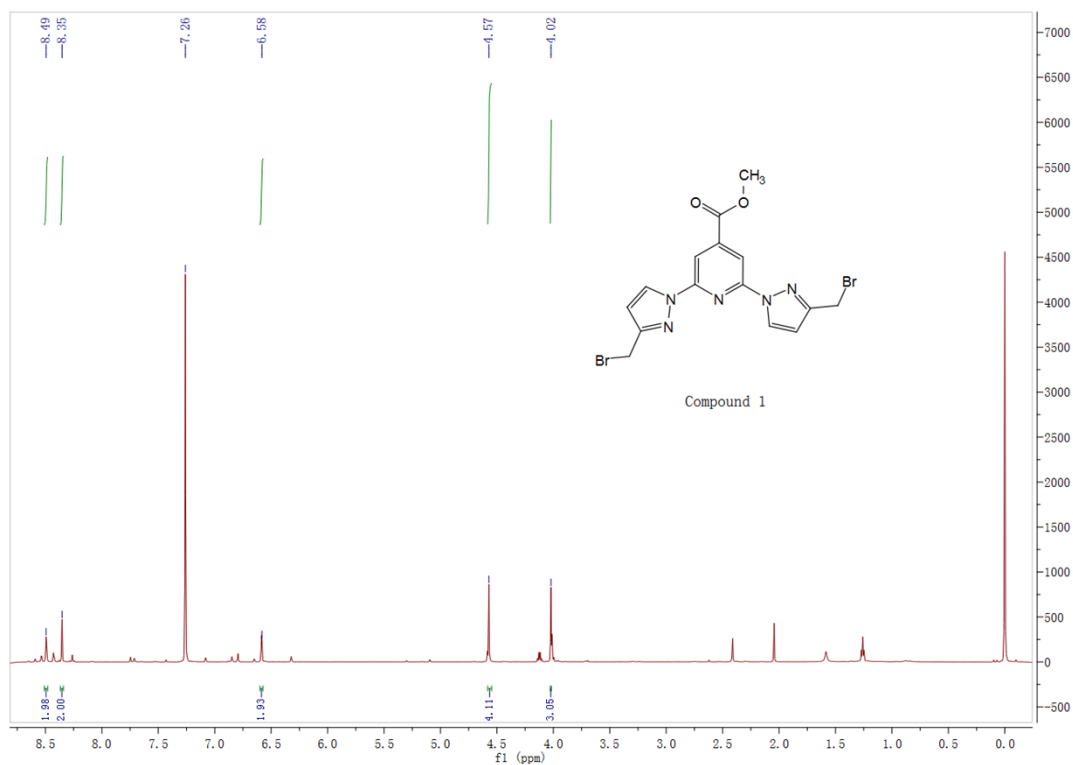

**Fig. S11**  $^1\text{H}$  NMR spectrum of Compound 1 in  $\text{CDCl}_3$  (600 MHz).

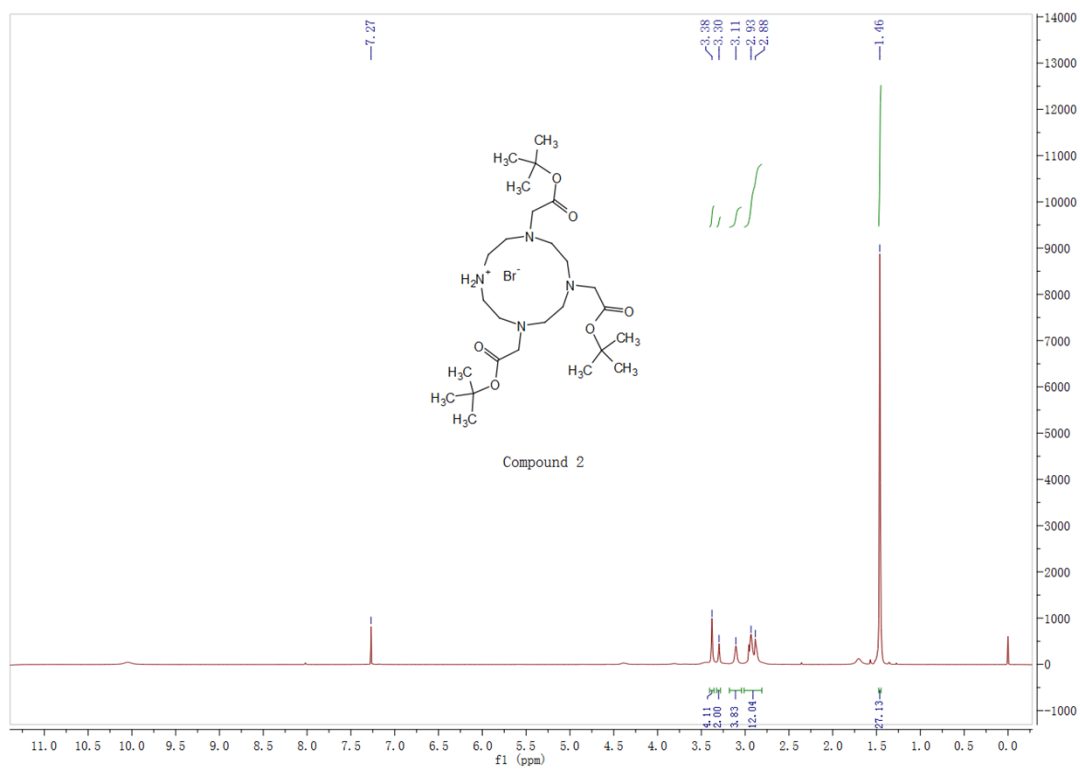

**Fig. S12**  $^1\text{H}$  NMR spectrum of Compound 2 in  $\text{CDCl}_3$  (600 MHz).

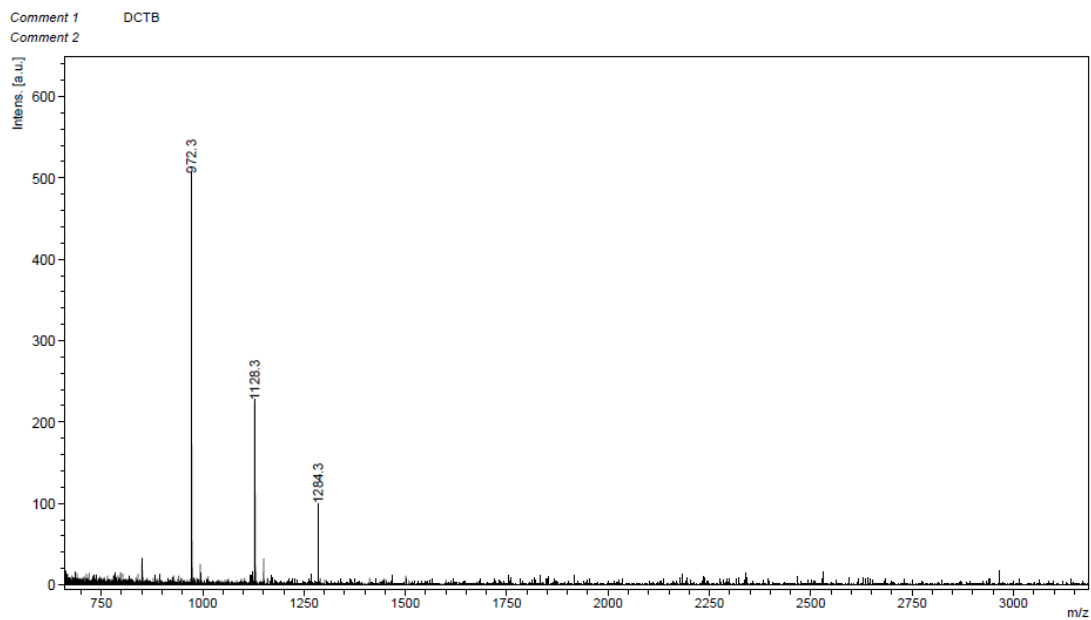

**Fig. S13** MALDI-TOF-MS spectrum of  $[\text{Gd}_2(\text{DO3A})_2\text{BMPNA}]$  in the presence of  $\text{Zn}^{2+}$  at room temperature after 7 days. No metal-ion exchange was observed.



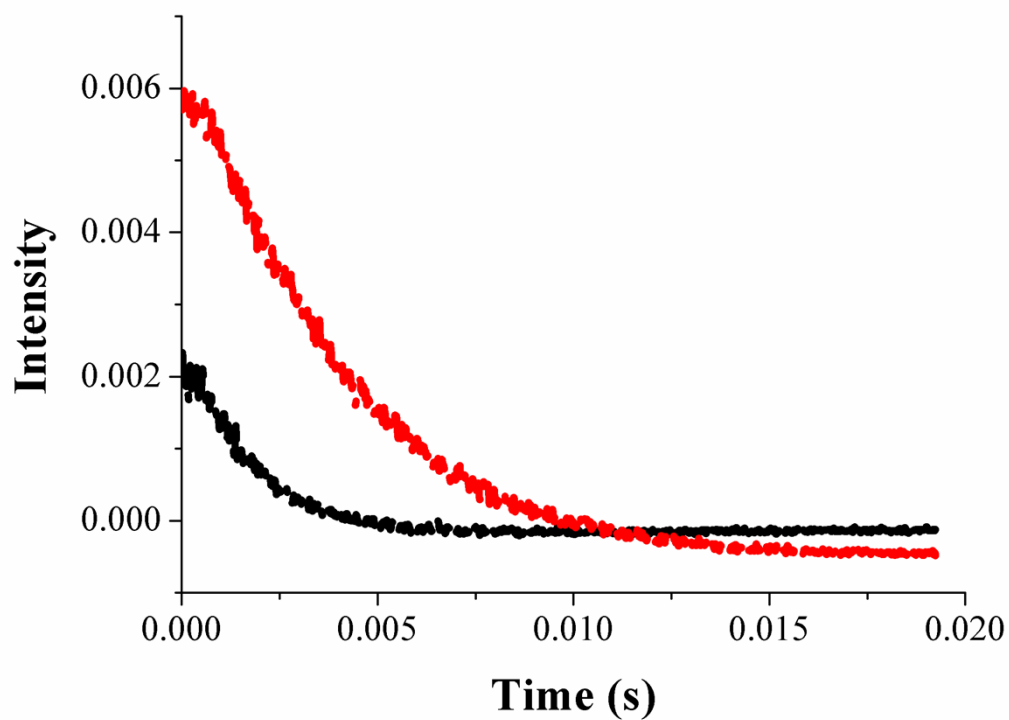

**Fig. S14** Luminescence decay of  $[\text{Tb}_2(\text{DO3A})_2\text{BMPNA}]$  in  $\text{H}_2\text{O}$  (black) and  $\text{D}_2\text{O}$  (red) with addition of  $\text{Cu}^{2+}$  and phosphate.
